# Supplementary material for: Influence of model-predicted rivaroxaban exposure and patient characteristics on efficacy and safety outcomes in patients with acute coronary syndrome
Source: PubMed Central journal article supplement — Ther Adv Cardiovasc Dis. 2019 Jul 31;13:1753944719863641. doi: 10.1177/1753944719863641 (PMC6669848; doi:10.1177/1753944719863641), 2019-07-31
Supplement: Riva_TDM_ACS_Supplemental_material_29Aug18.pdf [file Riva_TDM_ACS_Supplemental_material_29Aug18.pdf]

## Supplementary material

**Table S1.** Definition and Counts of Patient Characteristics for Inclusion in Exposure–Response Models.

| Covariate                                                                                         | Categories             | Exposure–Efficacy Models            |         | Exposure–Safety Models              |         |
|---------------------------------------------------------------------------------------------------|------------------------|-------------------------------------|---------|-------------------------------------|---------|
|                                                                                                   |                        | Patients<br>( <i>N</i> =<br>15 167) | Percent | Patients<br>( <i>N</i> =<br>15 350) | Percent |
| Patient characteristics included in the exposure–response models regardless of significance level |                        |                                     |         |                                     |         |
| Age                                                                                               | <65 years              | 9640                                | 63.6    | 9769                                | 63.6    |
|                                                                                                   | 65–75 years            | 4434                                | 29.2    | 4480                                | 29.2    |
|                                                                                                   | >75 years              | 1093                                | 7.2     | 1101                                | 7.2     |
| Baseline renal function<br>(CrCl)                                                                 | >80 mL/min             | 8825                                | 58.2    | 8884                                | 57.9    |
|                                                                                                   | 50–80 mL/min           | 5296                                | 34.9    | 5389                                | 35.1    |
|                                                                                                   | <50 mL/min             | 1046                                | 6.9     | 1077                                | 7.0     |
| Patient characteristics for potential inclusion in the exposure–response models                   |                        |                                     |         |                                     |         |
| Baseline antiplatelet use                                                                         | Aspirin plus<br>thieno | 14 133                              | 93.2    | 14 313                              | 93.2    |
|                                                                                                   | Aspirin                | 1034                                | 6.8     | 1037                                | 6.8     |
| Hospital region                                                                                   | Eastern Europe         | 6048                                | 39.9    | 6048                                | 39.4    |
|                                                                                                   | Asia                   | 2974                                | 19.6    | 3157                                | 20.6    |
|                                                                                                   | Western<br>Europe      | 2182                                | 14.4    | 2182                                | 14.2    |
|                                                                                                   | South America          | 1656                                | 10.9    | 1656                                | 10.8    |
|                                                                                                   | Others                 | 1441                                | 9.5     | 1441                                | 9.4     |

|                                                                           |               |                  |                  |        |      |
|---------------------------------------------------------------------------|---------------|------------------|------------------|--------|------|
|                                                                           | North America | 866              | 5.7              | 866    | 5.6  |
| History of stroke/TIA                                                     | No            | 14 767           | 97.4             | 14 948 | 97.4 |
|                                                                           | Yes           | 400              | 2.6              | 402    | 2.6  |
| Weight                                                                    | ≥60 to <90 kg | 10 128           | 66.8             | 10 247 | 66.8 |
|                                                                           | ≥90 kg        | 3675             | 24.2             | 3677   | 24.0 |
|                                                                           | <60 kg        | 1364             | 9.0              | 1426   | 9.3  |
| Sex                                                                       | Male          | 11 330           | 74.7             | 11 471 | 74.7 |
|                                                                           | Female        | 3837             | 25.3             | 3879   | 25.3 |
| Low baseline hemoglobin<br>(<13 g/dL for male and <12<br>g/dL for female) | No            | 12 210           | 80.5             | 12 321 | 80.3 |
|                                                                           | Yes           | 2957             | 19.5             | 3029   | 19.7 |
| History of GI bleeding                                                    | No            | Not<br>evaluated | Not<br>evaluated | 15 216 | 99.1 |
|                                                                           | Yes           | Not<br>evaluated | Not<br>evaluated | 134    | 0.9  |
| Baseline type of ACS                                                      | STEMI         | 7636             | 50.3             | 7725   | 50.3 |
|                                                                           | NSTEMI        | 3917             | 25.8             | 3929   | 25.6 |
|                                                                           | UA            | 3614             | 23.8             | 3696   | 24.1 |
| History of MI                                                             | No            | 11 061           | 72.9             | 11 202 | 73.0 |
|                                                                           | Yes           | 4106             | 27.1             | 4148   | 27.0 |
| History of diabetes mellitus                                              | No            | 10 328           | 68.1             | 10 442 | 68.0 |
|                                                                           | Yes           | 4839             | 31.9             | 4908   | 32.0 |
| History of heart failure                                                  | No            | 13 488           | 88.9             | 13 671 | 89.1 |
|                                                                           | Yes           | 1679             | 11.1             | 1679   | 10.9 |
| History of hypertension                                                   | Yes           | 10 288           | 67.8             | 10 362 | 67.5 |
|                                                                           | No            | 4879             | 32.2             | 4988   | 32.5 |
| Elevated cardiac enzymes                                                  | Yes           | 12 488           | 82.3             | 12 600 | 82.1 |

|                                             |           |                  |                  |      |      |
|---------------------------------------------|-----------|------------------|------------------|------|------|
|                                             | No        | 2679             | 17.7             | 2750 | 17.9 |
| Smoking status<br>(current/other)           | No        | Not<br>evaluated | Not<br>evaluated | 9017 | 58.7 |
|                                             | Yes       | Not<br>evaluated | Not<br>evaluated | 6333 | 41.3 |
| Alcohol use                                 | Abstinent | Not<br>evaluated | Not<br>evaluated | 8075 | 52.6 |
|                                             | Light     | Not<br>evaluated | Not<br>evaluated | 6086 | 39.6 |
|                                             | Moderate  | Not<br>evaluated | Not<br>evaluated | 1104 | 7.2  |
|                                             | Heavy     | Not<br>evaluated | Not<br>evaluated | 85   | 0.6  |
| Previous revascularization<br>(CABG or PCI) | Yes       | 9239             | 60.9             | 9252 | 60.3 |
|                                             | No        | 5928             | 39.1             | 6098 | 39.7 |

Abbreviations: ACS, acute coronary syndrome; CABG, coronary artery bypass grafting; CrCl, estimated creatinine clearance; GI, gastrointestinal; MI, myocardial infarction; NSTEMI, non-ST-segment elevation myocardial infarction; PCI, percutaneous coronary intervention; STEMI, ST-segment elevation myocardial infarction; TIA, transient ischemic attack; UA, unstable angina.

**Table S2.** Results of the Likelihood Ratio Test for the Final Models for Efficacy Outcomes.

| <b>Variable</b>                                  | <b>Degrees of<br/>Freedom</b> | <b>AIC</b> | <b>P Value (LRT)</b> |
|--------------------------------------------------|-------------------------------|------------|----------------------|
| MI, ischemic stroke, and nonhemorrhagic CV death |                               |            |                      |
| None (null model)                                | NA                            | 15851.42   | NA                   |
| C <sub>max</sub>                                 | 1                             | 15858.80   | 0.0022               |
| Age                                              | 2                             | 15871.10   | 0.00001              |
| CrCl                                             | 2                             | 15859.79   | 0.00206              |
| Type of ACS                                      | 2                             | 15857.48   | 0.00656              |
| History of MI                                    | 1                             | 15918.19   | <0.00001             |
| Previous revascularization                       | 1                             | 15890.09   | <0.00001             |
| History of diabetes mellitus                     | 1                             | 15858.19   | 0.00306              |
| History of heart failure                         | 1                             | 15875.68   | <0.00001             |
| Elevated cardiac enzymes                         | 1                             | 15861.06   | 0.00065              |
| Baseline hemoglobin                              | 1                             | 15869.51   | 0.00001              |
| MI, ischemic stroke, and death from all causes   |                               |            |                      |
| None (null model)                                | NA                            | 16324.40   | NA                   |
| C <sub>max</sub>                                 | 1                             | 16331.20   | 0.00302              |
| Age                                              | 2                             | 16343.68   | 0.00001              |
| CrCl                                             | 2                             | 16335.37   | 0.00056              |

|                              |   |          |          |
|------------------------------|---|----------|----------|
| History of MI                | 1 | 16395.67 | <0.00001 |
| Previous revascularization   | 1 | 16363.01 | <0.00001 |
| History of diabetes mellitus | 1 | 16331.73 | 0.00226  |
| History of heart failure     | 1 | 16346.10 | <0.00001 |
| Elevated cardiac enzymes     | 1 | 16385.59 | <0.00001 |
| Baseline hemoglobin          | 1 | 16339.89 | 0.00003  |

---

Abbreviations: ACS, acute coronary syndrome; AIC, Akaike information criterion;  $C_{\max}$  steady-state maximum plasma concentration; CrCl, estimated creatinine clearance; CV, cardiovascular; LRT, likelihood ratio test; MI, myocardial infarction; NA, not applicable.

**Table S3.** Results of the Likelihood Ratio Test for the Final Models for Safety Outcomes.

| <b>Variable</b>                 | <b>Degrees of Freedom</b> | <b>AIC</b> | <b>P Value (LRT)</b> |
|---------------------------------|---------------------------|------------|----------------------|
| TIMI major bleeding             |                           |            |                      |
| None (null model)               | NA                        | 3249.459   | NA                   |
| C <sub>max</sub>                | 1                         | 3275.479   | <0.00001             |
| Age                             | 2                         | 3254.442   | 0.0112               |
| CrCl                            | 2                         | 3246.607   | 0.56322              |
| Sex                             | 1                         | 3256.331   | 0.0029               |
| Previous revascularization      | 1                         | 3255.595   | 0.00434              |
| Clinically significant bleeding |                           |            |                      |
| None (null model)               | NA                        | 30052.66   | NA                   |
| C <sub>max</sub>                | 1                         | 30237.35   | <0.00001             |
| Age                             | 2                         | 30077.10   | <0.00001             |
| CrCl                            | 2                         | 30050.33   | 0.43262              |
| Hospital region                 | 5                         | 30180.86   | <0.00001             |
| Previous revascularization      | 1                         | 30065.07   | 0.00015              |
| History of hypertension         | 1                         | 30067.45   | 0.00004              |
| Baseline alcohol intake         | 3                         | 30064.99   | 0.00038              |
| Baseline hemoglobin             | 1                         | 30062.24   | 0.00067              |

Abbreviations: AIC, Akaike information criterion;  $C_{\max}$  steady-state maximum plasma concentration; CrCl, estimated creatinine clearance; LRT, likelihood ratio test; NA, not applicable.
